# Supplementary material for: Lindqvist@Nanoporous MOF-Based Catalyst for Effective Desulfurization of Fuels
Source: MDPI journal article supplement (doi:10.3390/nano12162887), 2022-08-22
Supplement: s1 [file s1]

# ELECTRONIC SUPPORTING INFORMATION

## Lindqvist@Nanoporous MOF-Based Catalyst for Effective Desulfurization of Fuels

Simone Fernandes <sup>1</sup>, Daniela Flores <sup>1</sup>, Daniel Silva <sup>1</sup>, Isabel Santos-Vieira <sup>2</sup>, Fátima Mirante <sup>1,\*</sup>, Carlos M. Granadeiro <sup>1,\*</sup> and Salete S. Balula <sup>1,\*</sup>

<sup>1</sup> LAQV/REQUIMTE & Department of Chemistry and Biochemistry, Faculty of Sciences, University of Porto, 4169-007 Porto, Portugal

<sup>2</sup> CICECO—Aveiro Institute of Materials, Department of Chemistry, University of Aveiro, 3810-193 Aveiro, Portugal

\* Correspondence: fatima.mirante@fc.up.pt (F.M.); cgranadeiro@fc.up.pt (C.M.G.); sbalula@fc.up.pt (S.S.B.)

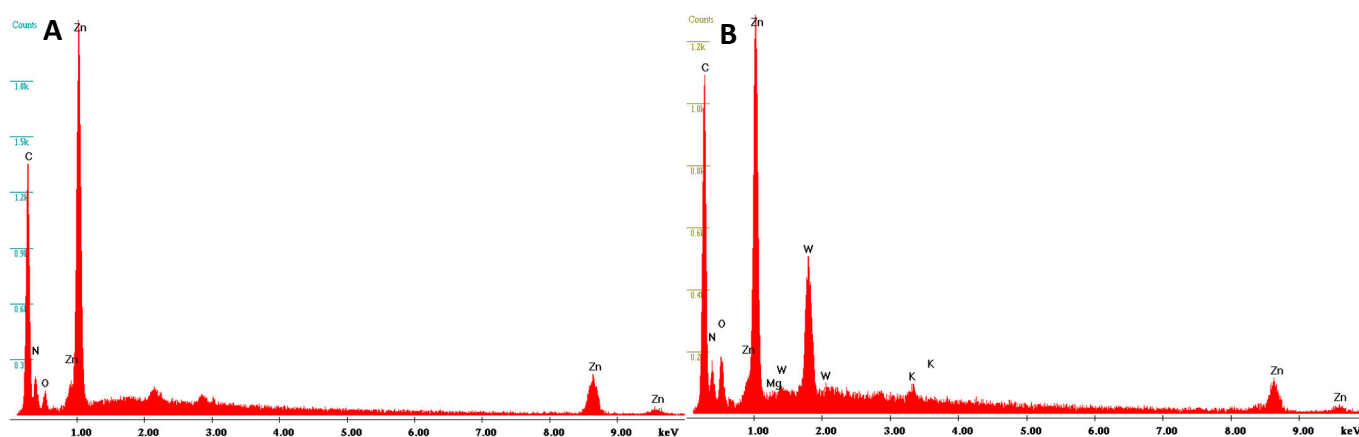

**Figure S1.** EDS spectra of (A) ZIF-8 support and (B) EuW<sub>10</sub>@ZIF-8 composite.

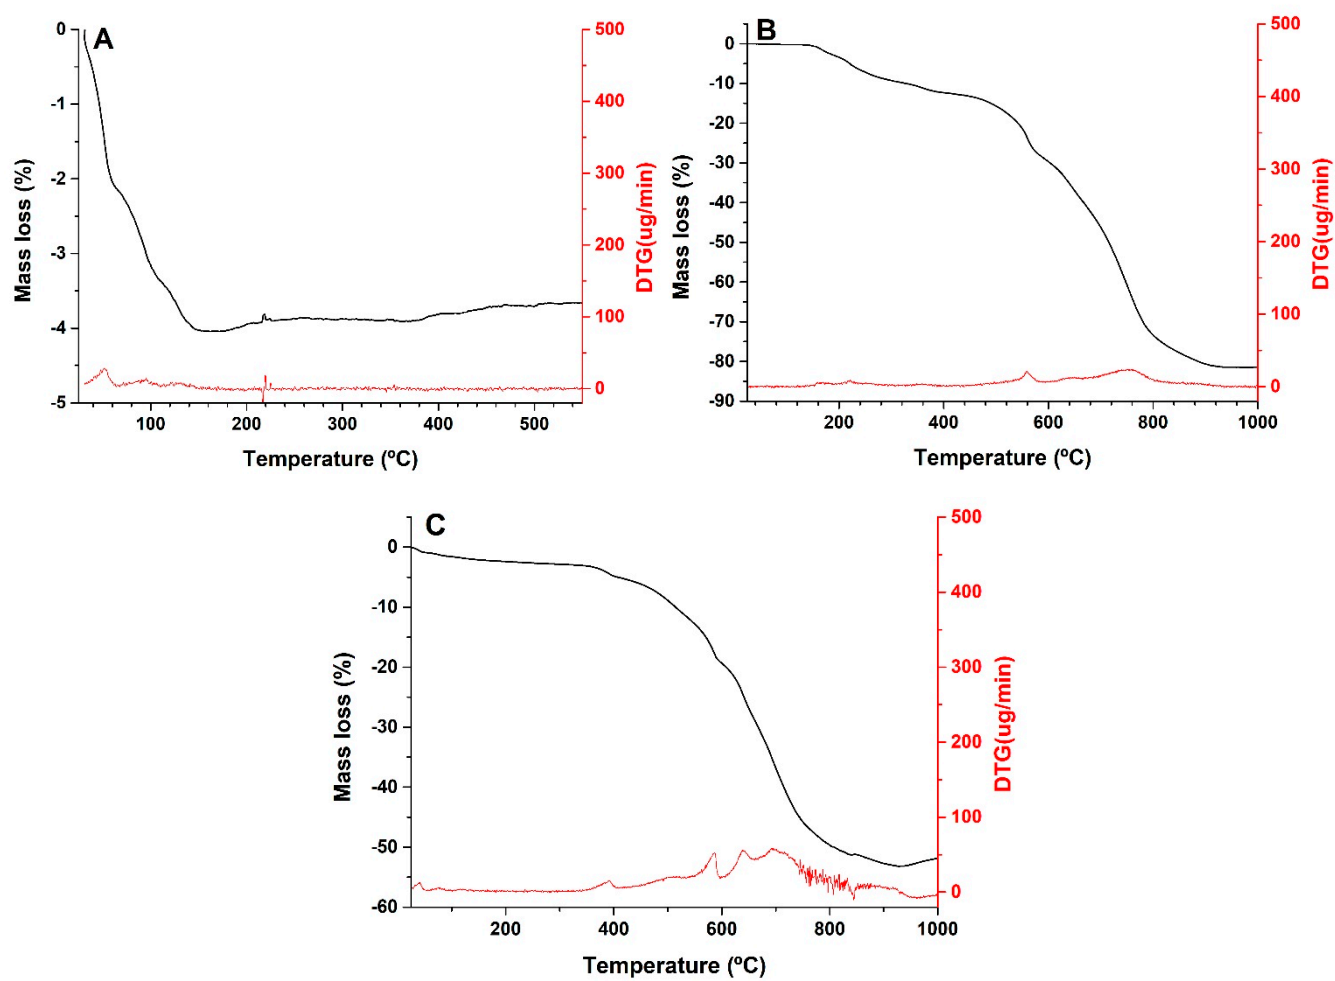

**Figure S2.** Thermogravimetric analysis (TGA) of (A) EuW<sub>10</sub>, (B) ZIF-8 and (C) EuW<sub>10</sub>@ZIF-8 composite.

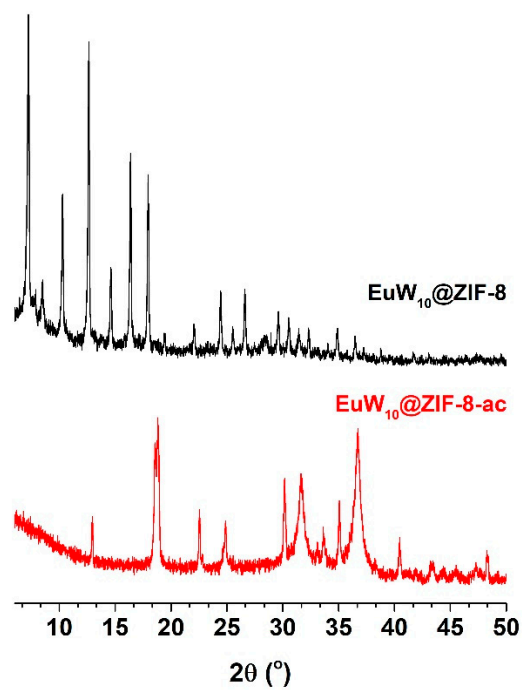

**Figure S3.** Powder XRD patterns of the  $\text{EuW}_{10}@\text{ZIF-8}$  composite as-prepared and after catalysis (ac).

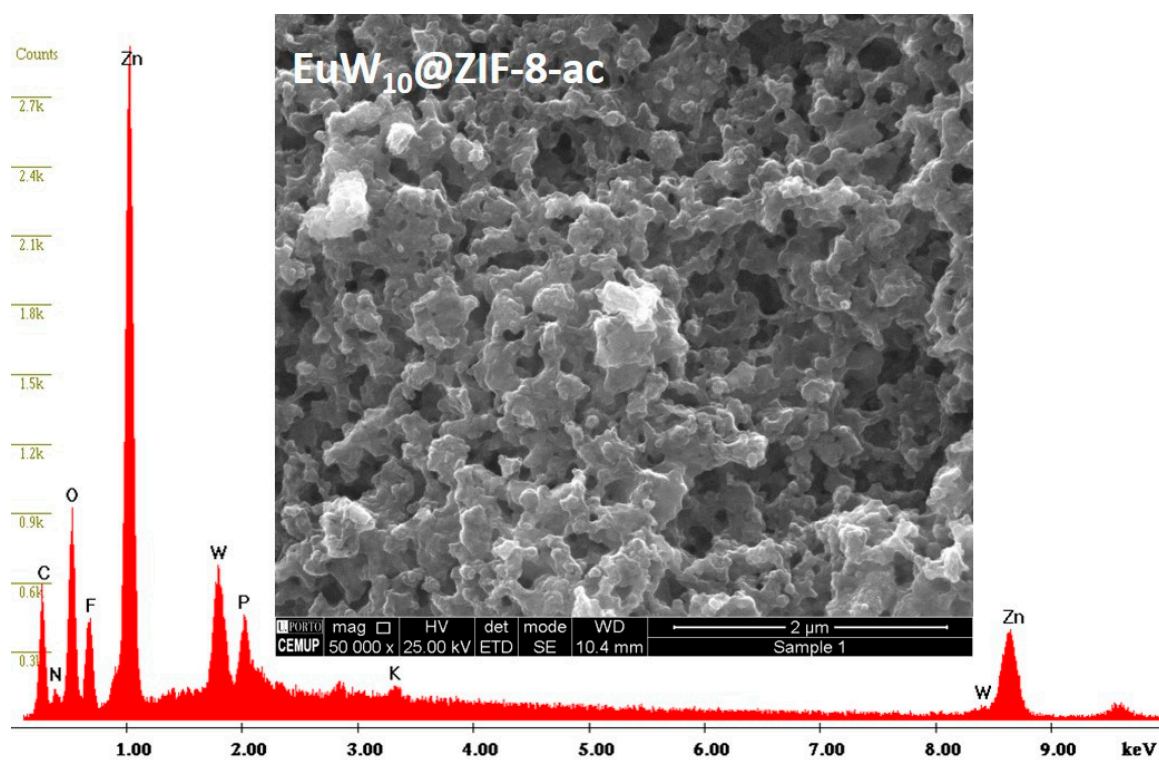

**Figure S4.** SEM image and EDS spectrum of the  $\text{EuW}_{10}@\text{ZIF-8}$  composite after catalysis.
